# Supplementary material
Source: HighWire-hosted journal article supplement (https://rmdopen.bmj.com/content/6/2/e001196)

A

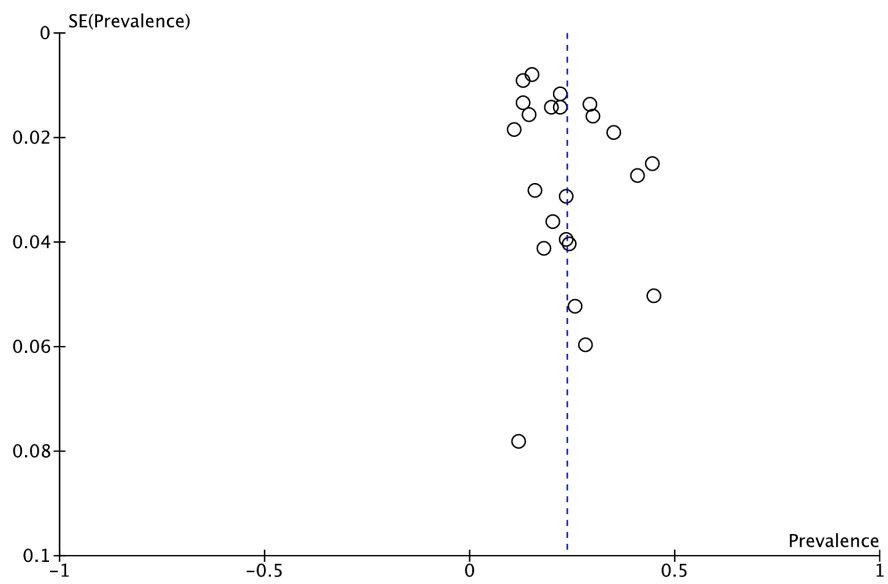

B

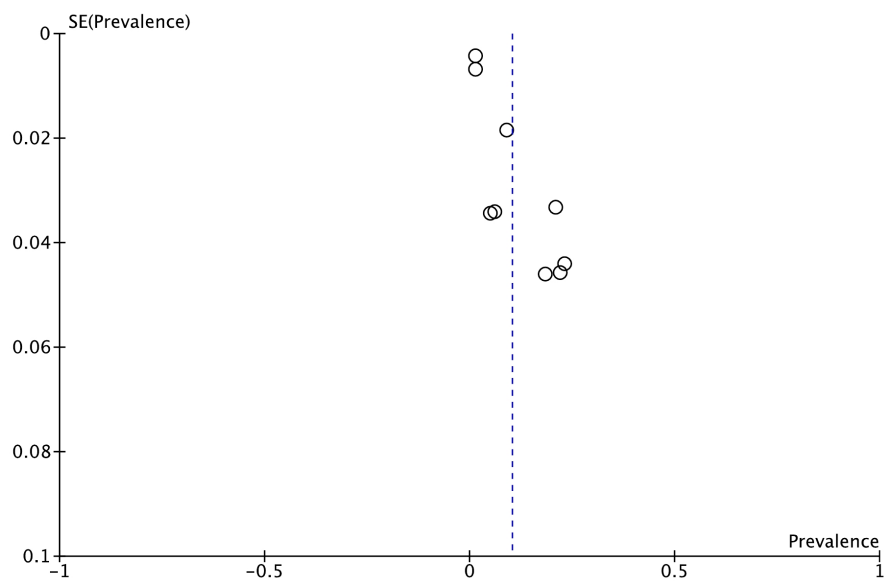

C

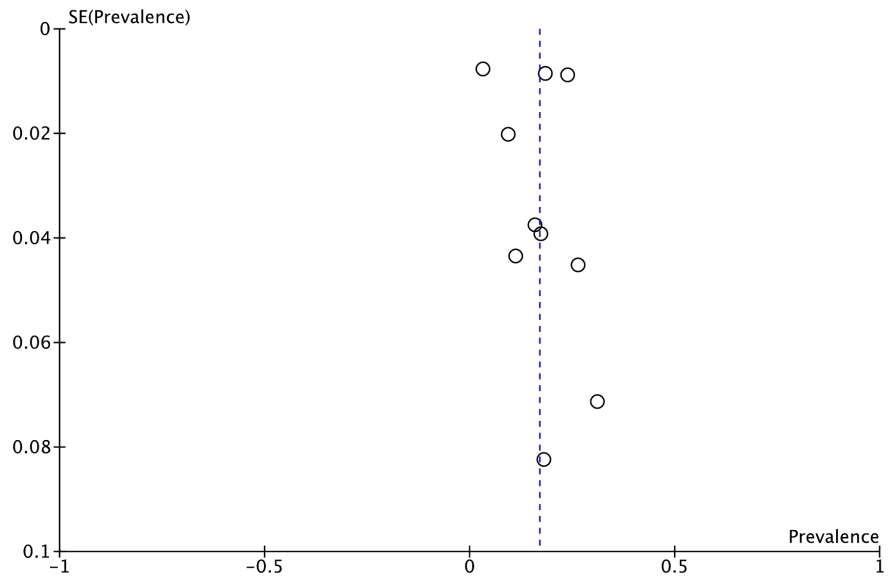

D

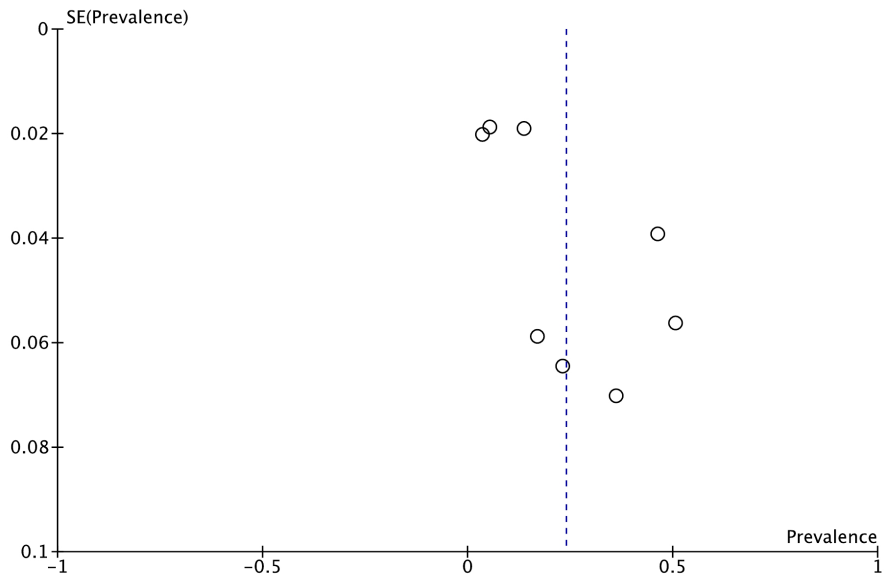

E

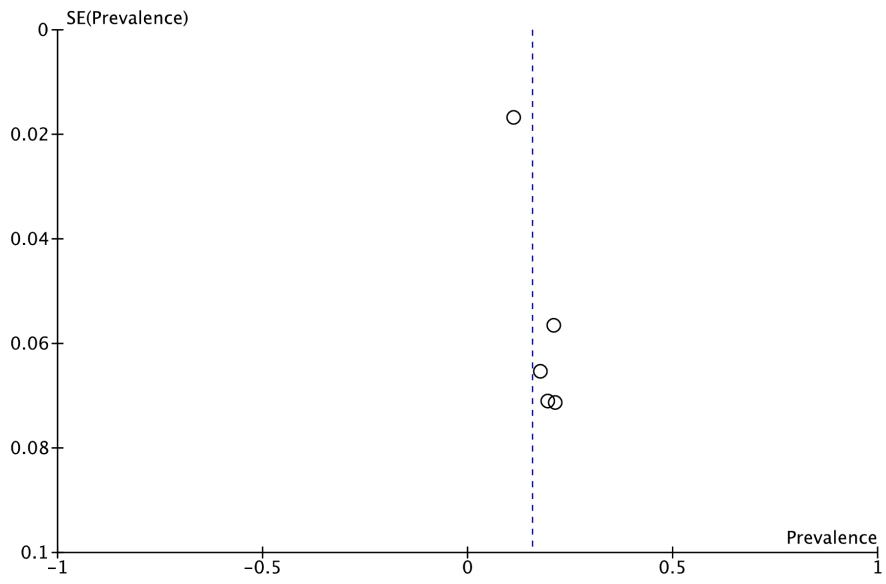

F

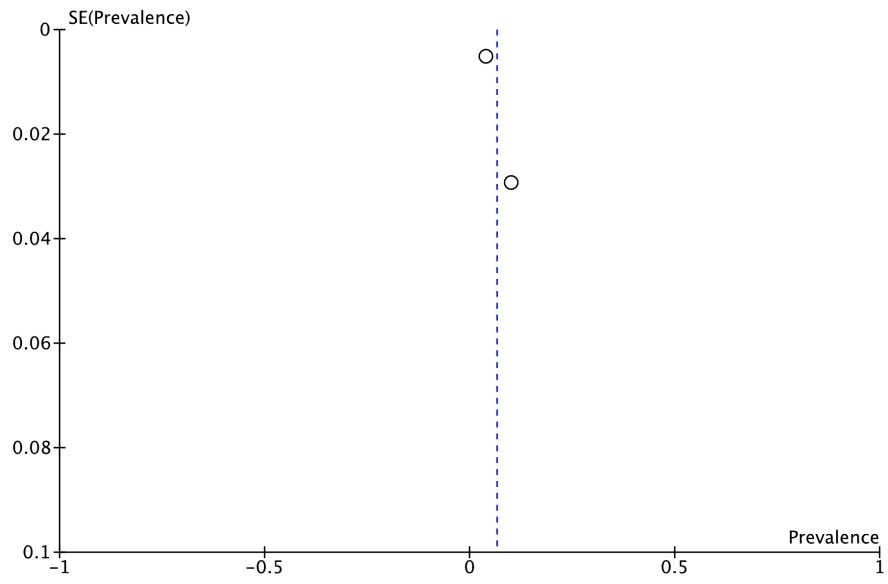

Supplement: inline-supplementary-material-1 [file inline-supplementary-material-1.pdf]
